# Supplementary material
Source: Springer Nature journal article supplement (https://www.springermedizin.de/resource/supplementary/12990_2009_234_MOESM9_ESM.pdf/9612850)

A. Regular thalamic input

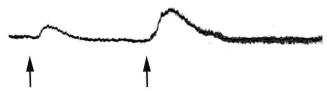

B. Bursting thalamic input

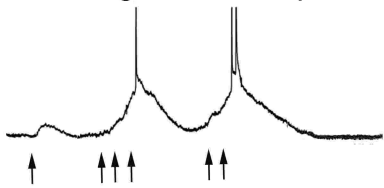

C. Circuit organization during two state conditions

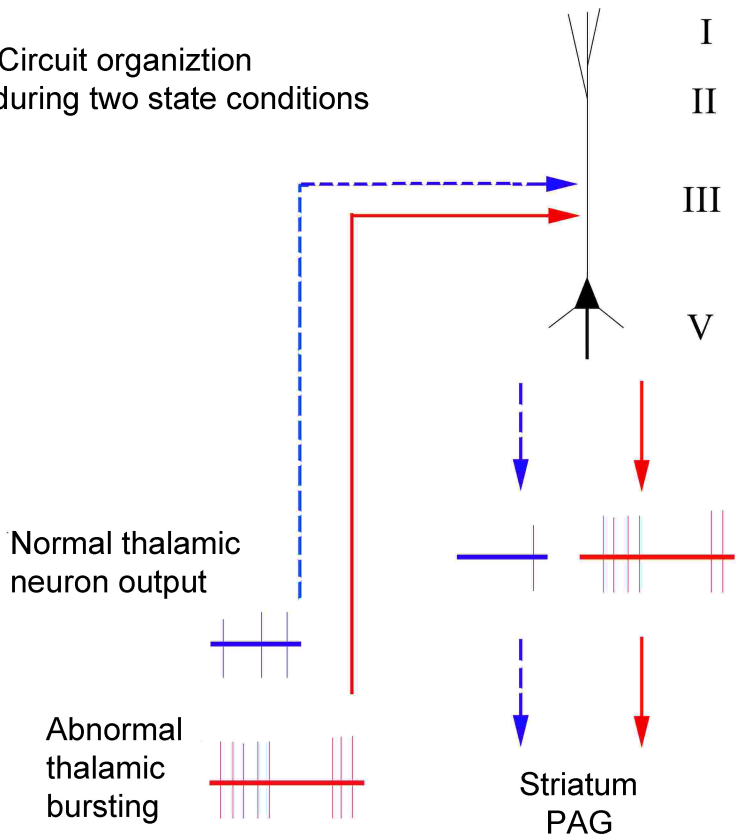

Supplement: MOESM9 [file 9612850]
